# Supplementary material for: Physiological and metabolic characteristics of novel double‐mutant female mice with targeted disruption of both growth hormone‐releasing hormone and growth hormone receptor
Source: PubMed Central journal article supplement (PMC8045953; doi:10.1111/acel.13339), 2021-03-23

1 **Supplemental Figure Legends**

2 ***Supplemental Figure 1. D-KO mice have increased GH and GHRH expression.***

3 *Expression of growth hormone gene was measured in pituitary gland in GHRH-KO, GHR-KO,*  
4 *D-KO and WT mice. Expression of growth hormone releasing hormone gene was measured in*  
5 *hypothalamus in GHRH-KO, GHR-KO, D-KO and WT mice. For all biological groups n=8.*  
6 *Each bar represents means. Statistical analysis was performed with one-way ANOVA with*  
7 *Benjamini and Hochberg false discovery rate (FDR); different letters denote significant*  
8 *difference at  $P < 0.05$ .*

9 ***Supplemental Figure 2. D-KO mice have altered body composition parameters.***

10 *Body composition parameters: BMD (A), BMC (B), lean mass (C) and fat mass (D) were*  
11 *measured by DXA. WT n=12, D-KO n=11. Each bar represents mean  $\pm$  SEM. Statistical*  
12 *analysis was performed by unpaired Student's t-test with Welch's correction; ns= not*  
13 *significant, \*\*\* $p < 0.001$ , \*\*\*\* $p < 0.0001$ .*

14 ***Supplemental Figure 3. Physical activity in D-KO mice. Locomotor activity (A) and ambulatory***

15 *activity (B) of WT and D-KO mice during a period of 6 days are shown. WT n=11, KO n=12.*

16 *Averaged locomotor activity (C, D) and ambulatory activity (E, F) are shown as light (C, E) and*  
17 *dark (D, F) cycles for WT and D-KO mice. Each bar represents mean  $\pm$  SEM. Statistical analysis*  
18 *was performed with unpaired Student's t-test with Welch's correction; ns= not significant,*  
19 *\*\* $p < 0.01$ , c; \*\*\* $p < 0.001$ .*

20 ***Supplemental Figure 4. Longevity of D-KO mice. Kaplan-Meier survival curves for each***

21 *genotype: D-KO (red) and WT (black) mice. WT n=28, D-KO n=24.*

22

Supplemental Figure 1

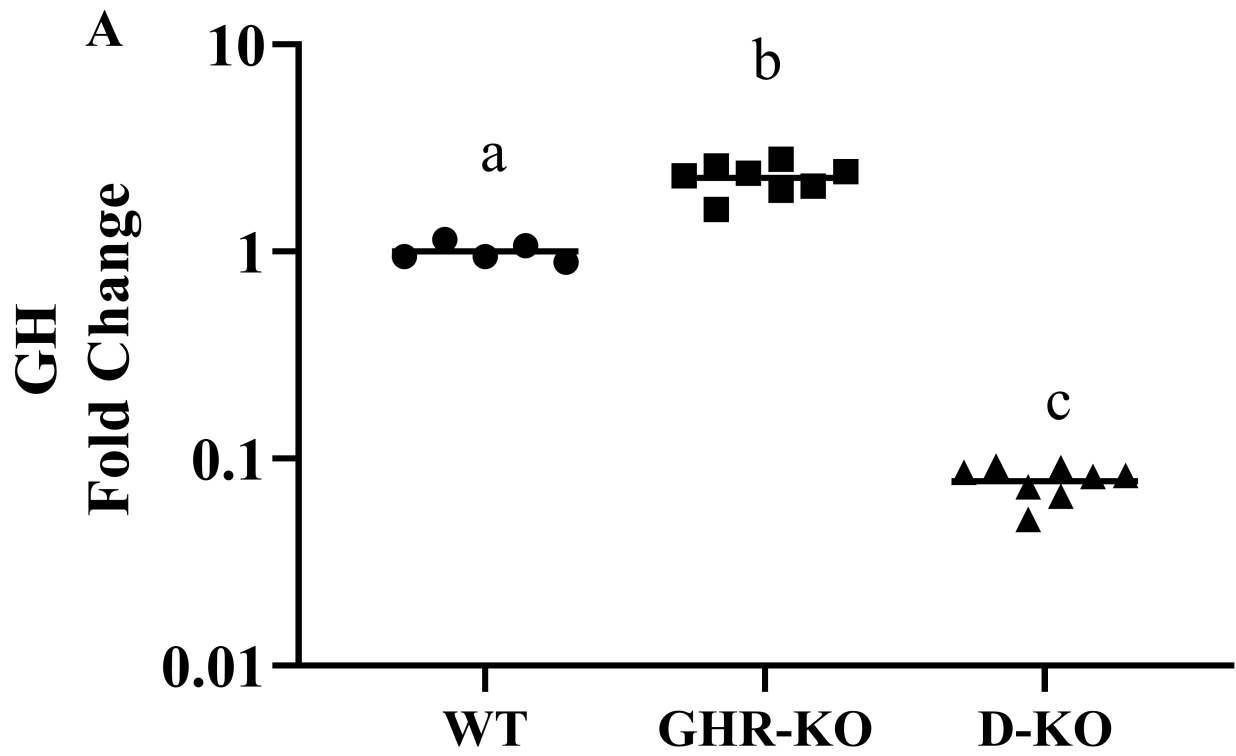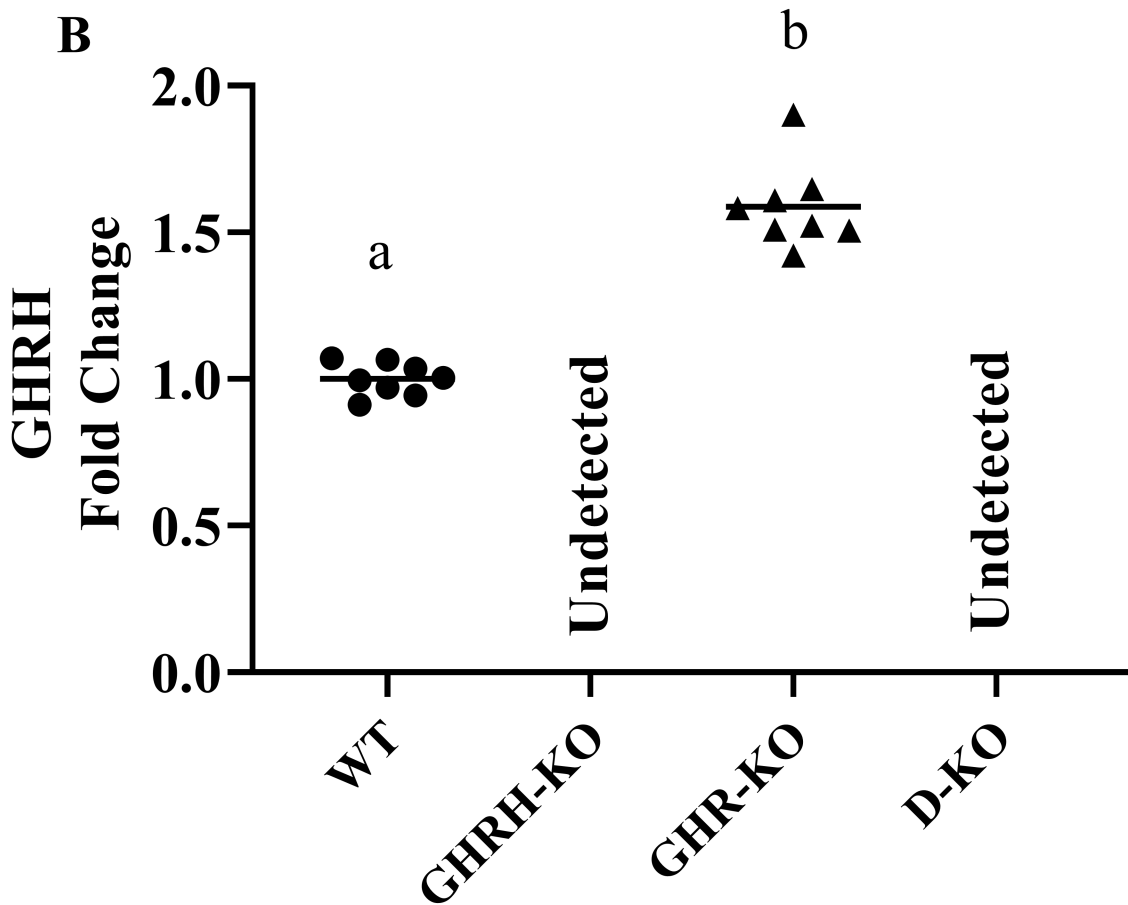

# Supplemental Figure 2

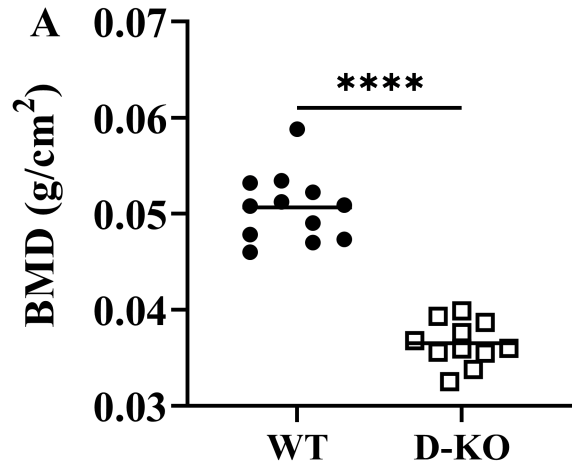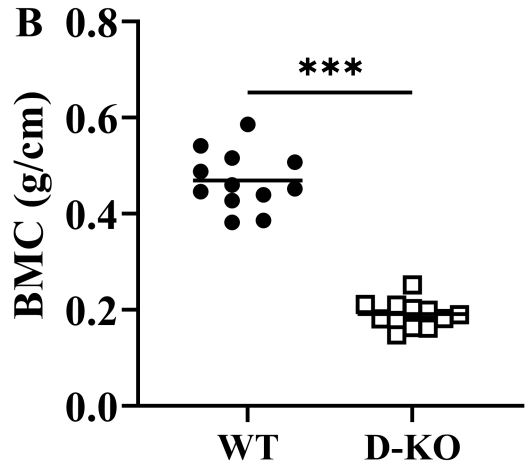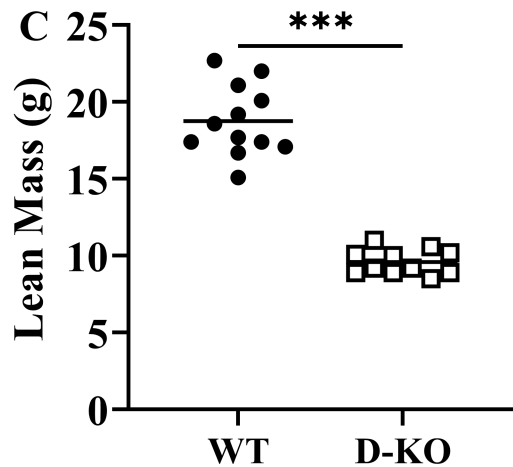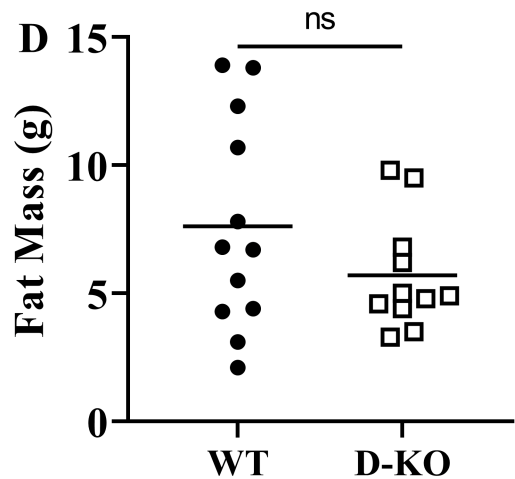

# Supplemental Figure 3

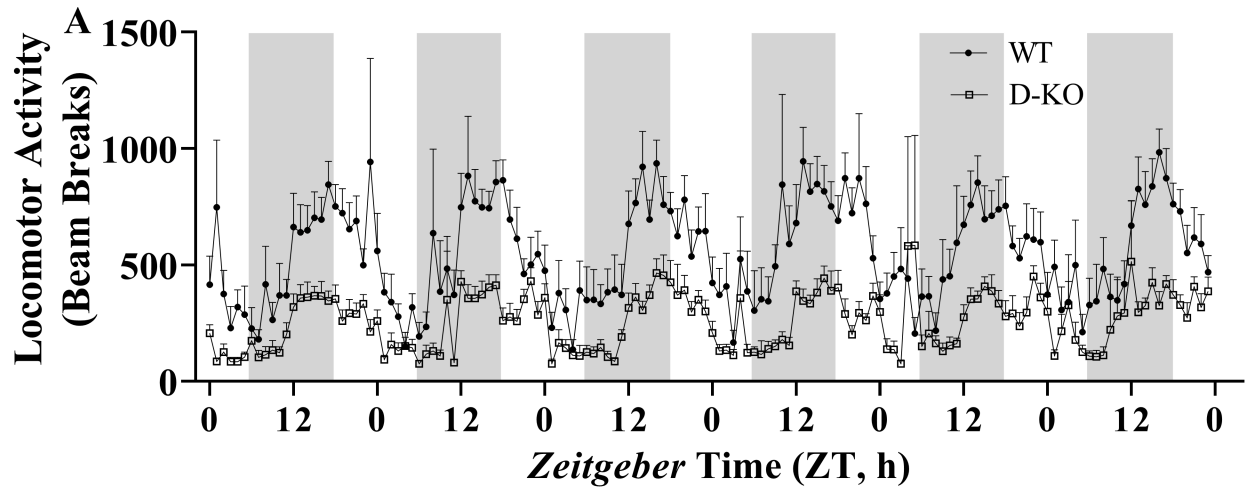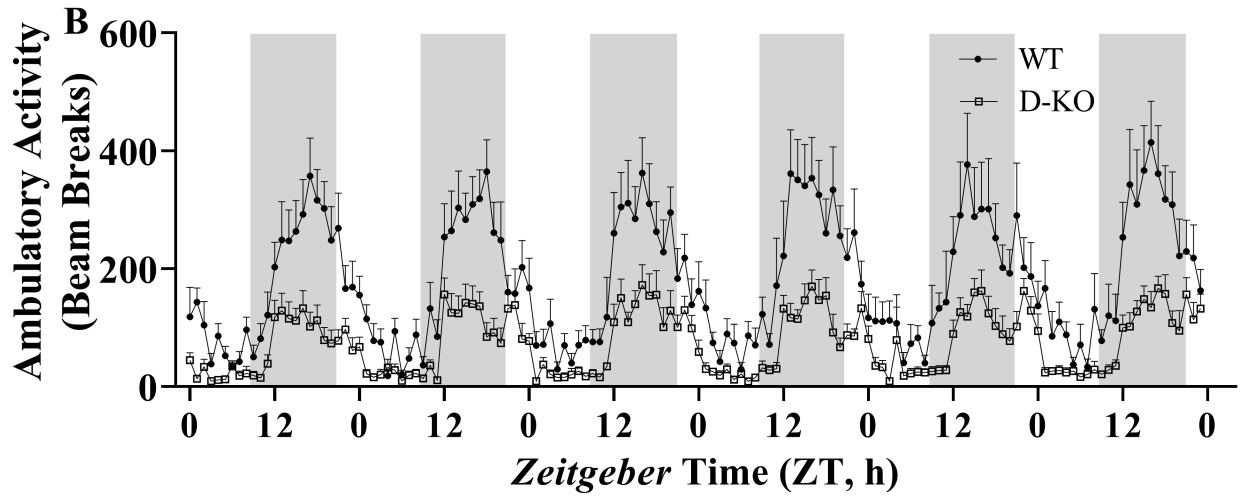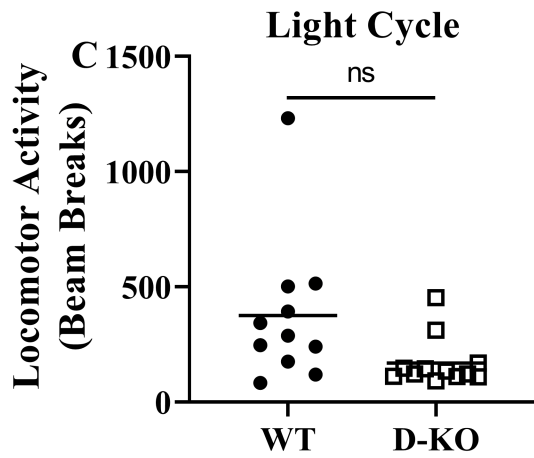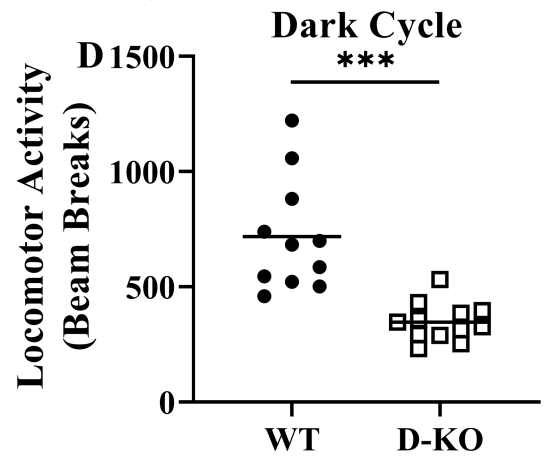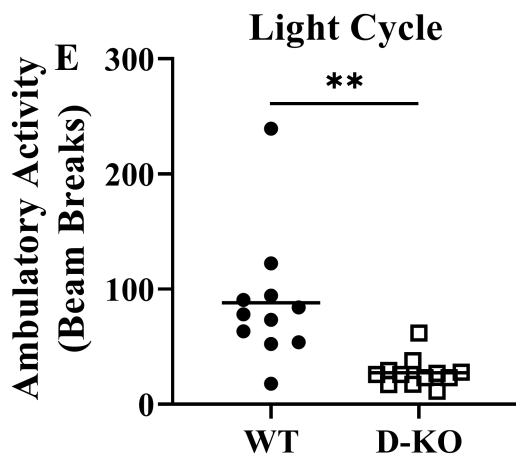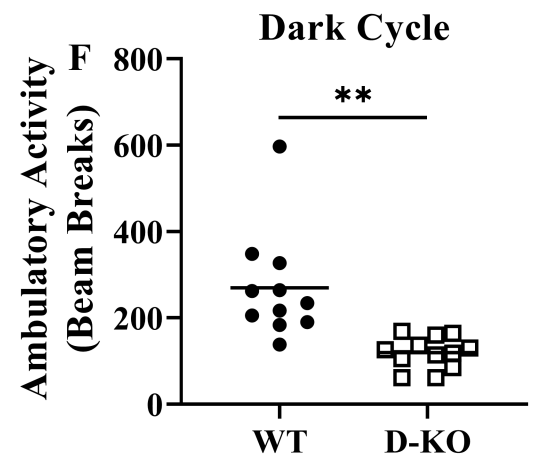

Supplemental Figure 4

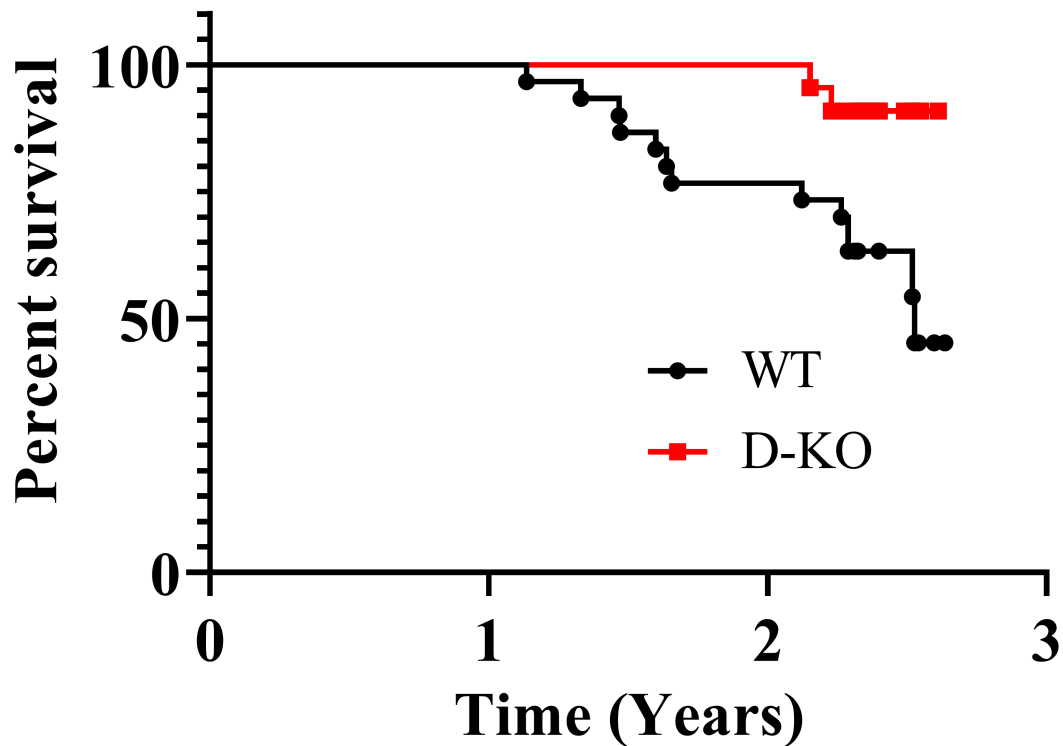

Supplement: ACEL-20-e13339-s001.pdf [file ACEL-20-e13339-s001.pdf]
